# Supplementary material for: Hygroscopic motions of fossil conifer cones
Source: PubMed Central journal article supplement (PMC5225473; doi:10.1038/srep40302), 2017-01-11
Supplement: srep40302-s2.pdf [file srep40302-s2.pdf]

## Supplementary Information for

### **Hygroscopic motions of fossil conifer cones**

Simon Poppinga,<sup>1,2,3\*</sup> Nikolaus Nestle,<sup>4</sup> Andrea Šandor,<sup>4</sup> Bruno Reible,<sup>5</sup> Tom Masselter,<sup>1</sup> Bernd

Bruchmann,<sup>3,4</sup> Thomas Speck<sup>1,2</sup>

<sup>1</sup>Plant Biomechanics Group, Botanic Garden, University of Freiburg, Faculty of Biology, D-79104 Freiburg im Breisgau, Germany.

<sup>2</sup>Freiburg Materials Research Center (FMF), University of Freiburg, D-79104 Freiburg im Breisgau, Germany.

<sup>3</sup>Joint Research Network on Advanced Materials and Systems (JONAS).

<sup>4</sup>BASF SE Advanced Materials and Systems Research, D-67056 Ludwigshafen, Germany.

<sup>5</sup>Department of Orthopedics and Traumatology Heidelberg, Heidelberg University Hospital, D-69118 Heidelberg.

\*Corresponding author. Email: [simon.poppinga@biologie.uni-freiburg.de](mailto:simon.poppinga@biologie.uni-freiburg.de)

**Supplementary Video S1:** Time-lapse recording of the hydration motion of the *Pinus* sp. 2 cone  
(recording speed: 1 frame per 30 seconds, playback speed: 20 fps).
